# Supplementary material for: Compactness of Protein Folds Alters Disulfide‐Bond Reducibility by Three Orders of Magnitude: A Comprehensive Kinetic Case Study on the Reduction of Differently Sized Tryptophan Cage Model Proteins
Source: PubMed Central journal article supplement (PMC7079008; doi:10.1002/cbic.201900470), 2019-11-18
Supplement: CBIC-21-681-s001.pdf [file CBIC-21-681-s001.pdf]

# CHEMBIOCHEM

## Supporting Information

### **Compactness of Protein Folds Alters Disulfide-Bond Reducibility by Three Orders of Magnitude: A Comprehensive Kinetic Case Study on the Reduction of Differently Sized Tryptophan Cage Model Proteins**

Dániel Horváth,<sup>[a]</sup> Nóra Taricska,<sup>[a]</sup> Ernő Keszei,<sup>[b]</sup> Pál Stráner,<sup>[a]</sup> Viktor Farkas,<sup>[a]</sup>  
Gábor K. Tóth,<sup>[c]</sup> and András Perczel<sup>\*[a]</sup>

cbic\_201900470\_sm\_miscellaneous\_information.pdf

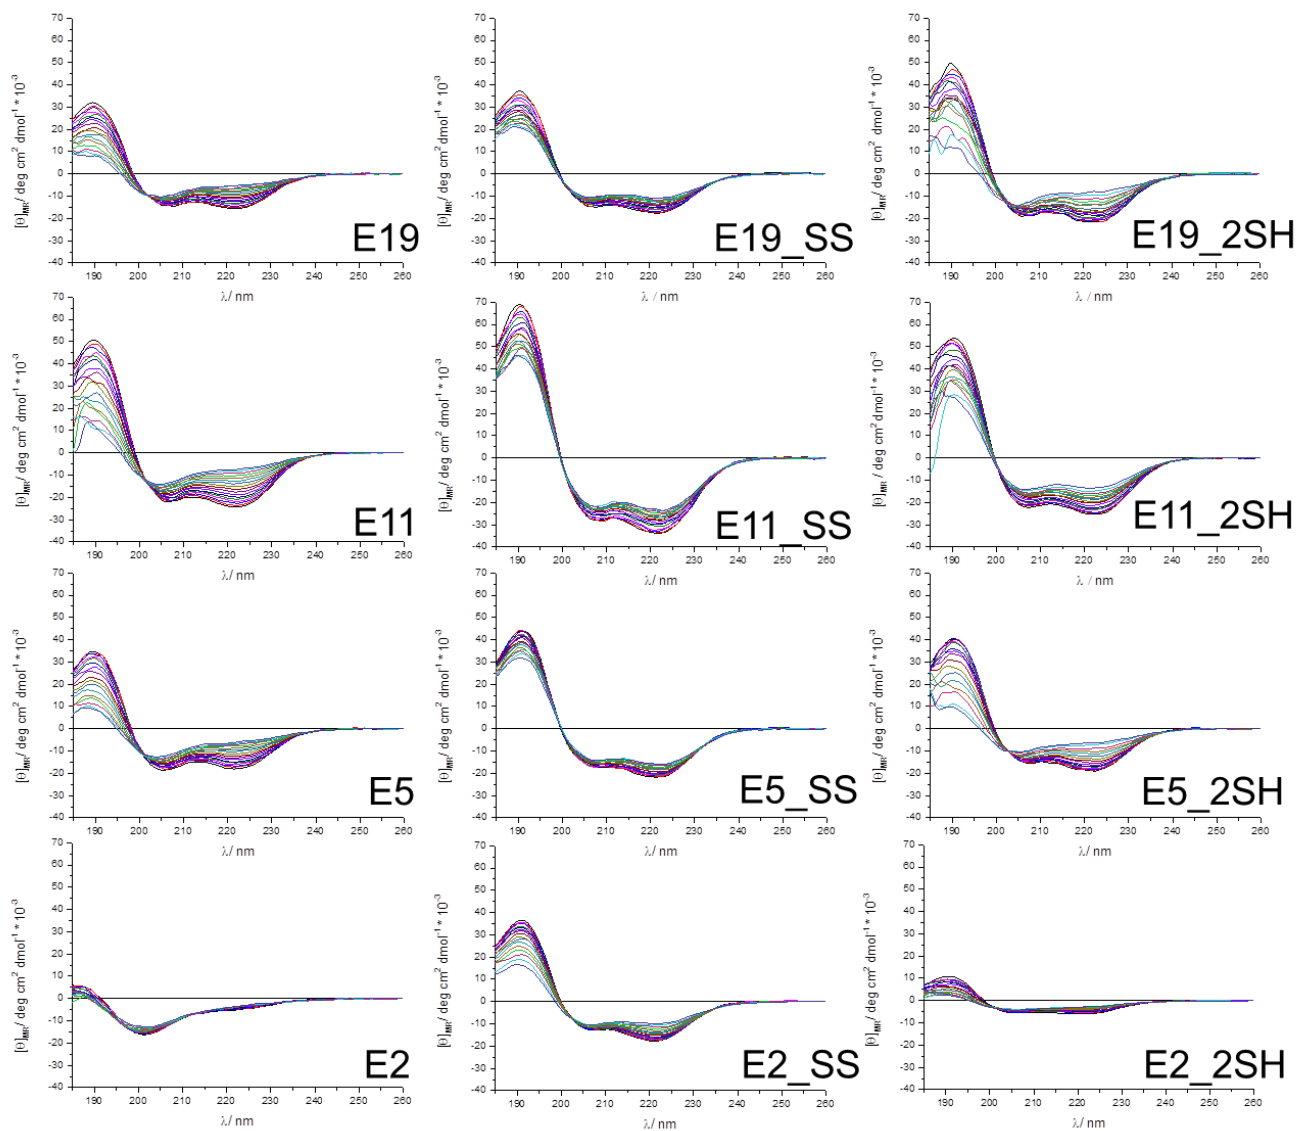

**Supplementary Figure 1.** Temperature dependent (5–85 °C) far-UV ECD spectra (185–260 nm) of parent, SS-bond enhanced and SS-bond reduced Exenatide derivatives.

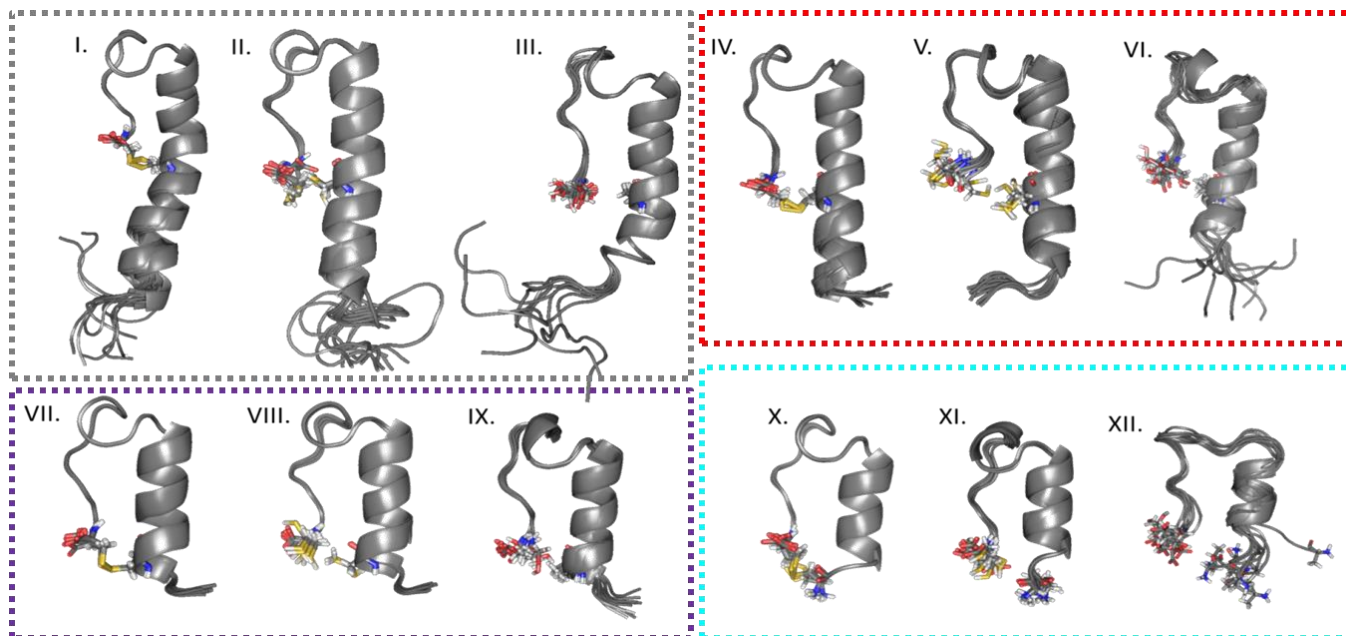

**Supplementary Figure 2:** The best 10 membered structure ensembles of our set of model proteins: I. E19\_SS; II. E19\_2SH; III. E19; IV. E11\_SS; V. E11\_2SH; VI. E11; VII. E5\_SS; VIII. E5\_2SH; IX. E5; X. E2\_SS; XI. E2\_2SH; XII. E2; The structure ensembles were determined by NOESY restraint sets at 15 °C *pH* = 7. For the number of assigned cross-peaks see **Stable 1**. The structure of the parent proteins (E19, E11, E5, E2) were determined by Rovó et al. [56]

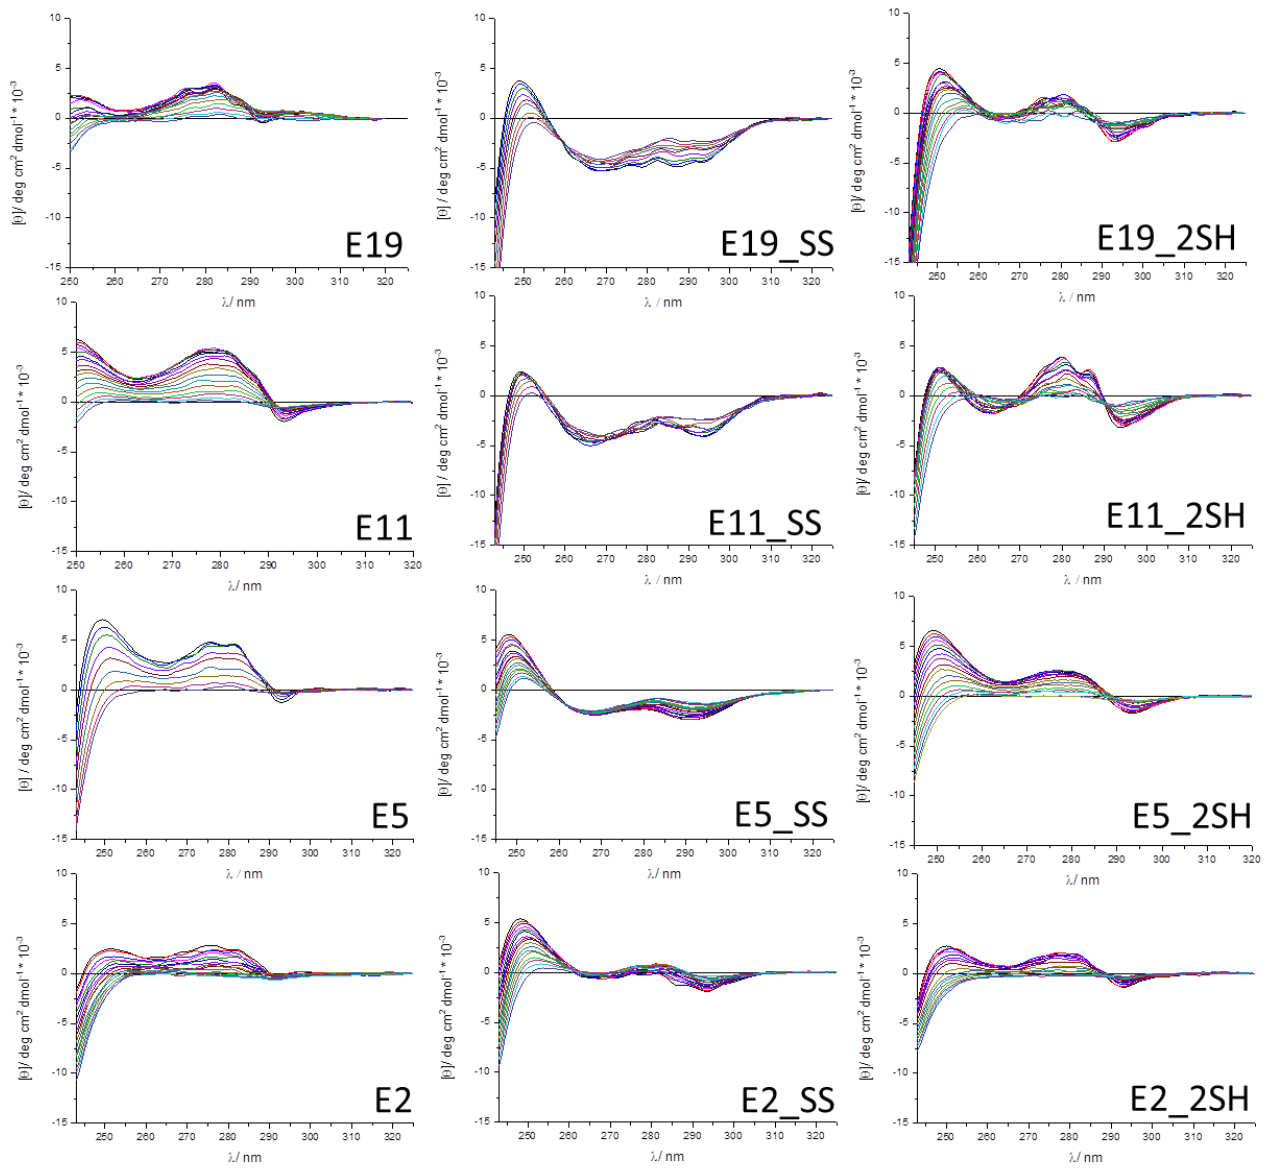

**Supplementary Figure 3.** Temperature dependent (5–85°C) near-UV ECD spectra (240–325 nm) of parent, SS-bond enhanced and SS-bond reduced Exenatide derivatives.

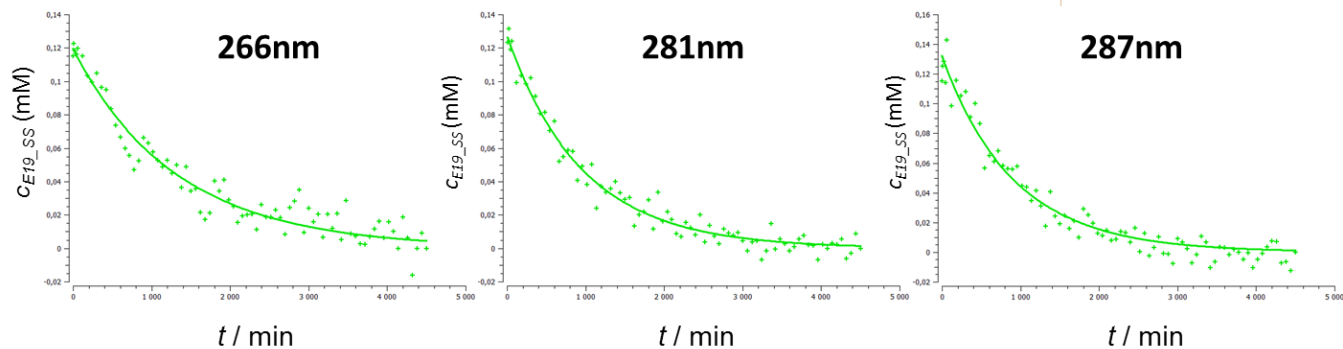

| $\lambda$<br>[nm] | $k_1$ reduction<br>[L mmol <sup>-1</sup> min <sup>-1</sup> ] | stdev ( $k_1$ )       | int. hw               | upper limit           | lower limit           | [SS] <sub>0</sub> estimated<br>[mM] | stdev ([SS] <sub>0</sub> ) | int. hw | upper limit | lower limit |
|-------------------|--------------------------------------------------------------|-----------------------|-----------------------|-----------------------|-----------------------|-------------------------------------|----------------------------|---------|-------------|-------------|
| 266               | $4.11 \times 10^{-4}$                                        | $1.15 \times 10^{-5}$ | $2.63 \times 10^{-5}$ | $3.85 \times 10^{-4}$ | $4.37 \times 10^{-4}$ | 0.119                               | 0.0020                     | 0.0046  | 0.1149      | 0.1240      |
| 281               | $5.67 \times 10^{-4}$                                        | $1.25 \times 10^{-5}$ | $2.86 \times 10^{-5}$ | $5.38 \times 10^{-4}$ | $5.95 \times 10^{-4}$ | 0.127                               | 0.0017                     | 0.0039  | 0.1234      | 0.1313      |
| 287               | $5.98 \times 10^{-4}$                                        | $1.68 \times 10^{-5}$ | $3.85 \times 10^{-5}$ | $5.59 \times 10^{-4}$ | $6.36 \times 10^{-4}$ | 0.132                               | 0.0022                     | 0.0049  | 0.1272      | 0.1370      |

**Supplementary Figure 4.** Parameter estimation of the E19\_SS reduction kinetics ( $\sim 0.113$  mM E19\_SS,  $pH = 7$ ,  $15^\circ\text{C}$ , 18-fold excess of TCEP) monitored by near-UV ECD at 3 characteristic wavelengths, namely at 266, 281 and 287 nm. Stdev means standard deviation, int. hw is for the half-width of the 95% confidence interval whose upper and lower limit is also given.

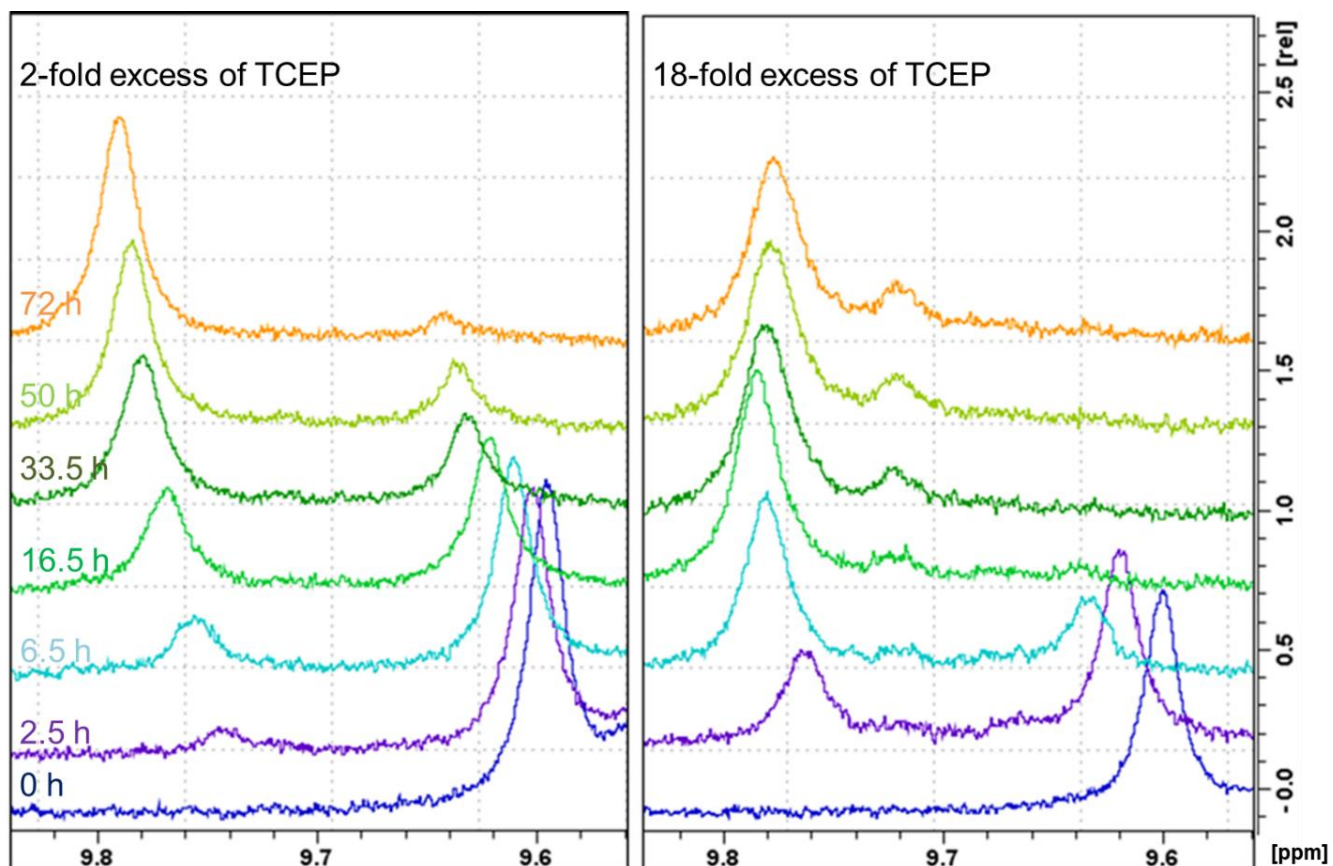

**Supplementary Figure 5.** SS-bond reduction monitored by the H $\epsilon$ 1 (25Trp) resonance shift of E19\_SS/E19\_2SH at 2- and 18-fold molar excess of TCEP. The H $\epsilon$ 1 resonance of the oxidized form is at 9.60 ppm with intensity / integral decreasing, while that of the reduced form (9.76 ppm) emerges as the reduction time proceeds. In the presence of a large excess of TCEP, an uncharacterized H $\epsilon$ 1 resonance form appears (9.72 ppm), likely that of a by-product of the lengthy reduction.

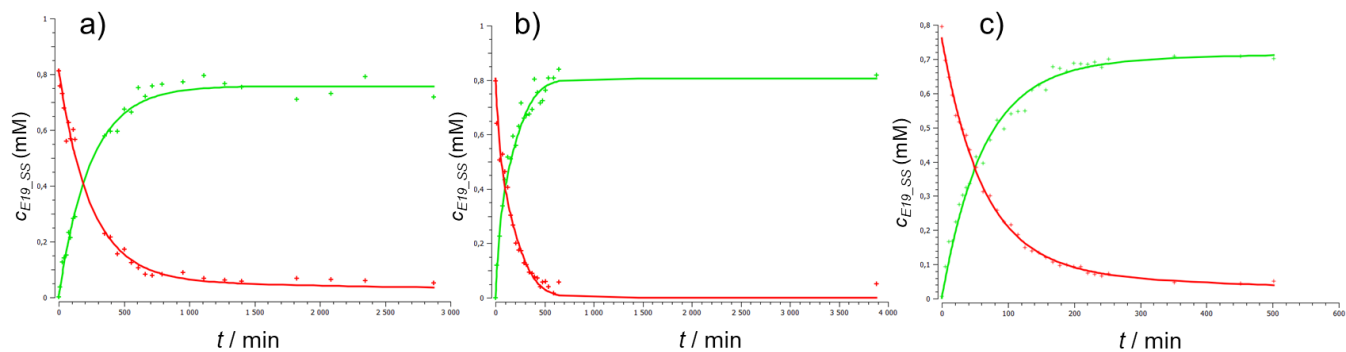

| E19_SS | experimental conditions |                 |                             |                           |                             |                                  |                             | parameters |                                                           |       |                             |                                                           |        |                                                               |        |
|--------|-------------------------|-----------------|-----------------------------|---------------------------|-----------------------------|----------------------------------|-----------------------------|------------|-----------------------------------------------------------|-------|-----------------------------|-----------------------------------------------------------|--------|---------------------------------------------------------------|--------|
|        | $T$ [°C]                | [SS] [mM]       | [RA <sub>red</sub> ] [mM]   | [RA <sub>red</sub> ]/[SS] | Conversion rate [%]         | elapsed time to steady state [h] | [O <sub>2</sub> ] [mM]      | [SS] [mM]  | Reduction $k_1$ [L mmol <sup>-1</sup> min <sup>-1</sup> ] |       |                             | Oxidation $k_2$ [L mmol <sup>-1</sup> min <sup>-1</sup> ] |        | Precipitation $k_3$ [L mmol <sup>-1</sup> min <sup>-1</sup> ] |        |
|        | Value                   | $t_{1/2}$ [min] | relative std. deviation [%] | Value                     | relative std. deviation [%] | Value                            | relative std. deviation [%] | Value      | relative std. deviation [%]                               | Value | relative std. deviation [%] |                                                           |        |                                                               |        |
| a)     | 15                      | 0.81            | 12.78                       | 15.72                     | 92                          | ~15                              | 1.00                        | 0.82       | $3.05 \times 10^{-4}$                                     | 181   | 3.27                        | $2.69 \times 10^{-4}$                                     | 107.40 | $1.30 \times 10^{-5}$                                         | 88.29  |
| b)     | 25                      | 0.80            | 12.78                       | 16.00                     | 94                          | ~6                               | 0.35                        | 0.81       | $7.68 \times 10^{-4}$                                     | 72    | 9.78                        | $1.86 \times 10^{-2}$                                     | 13.30  | n.d.                                                          | n.d.   |
| c)     | 37                      | 0.80            | 12.78                       | 15.95                     | 94                          | ~4                               | 0.58                        | 0.76       | $1.15 \times 10^{-3}$                                     | 48    | 1.68                        | $2.27 \times 10^{-3}$                                     | 48.32  | $3.95 \times 10^{-5}$                                         | 109.24 |
| –      | 60                      | 0.81            | 12.78                       | 15.75                     | n.d.                        | n.d.                             | n.d.                        | n.d.       | n.d.                                                      | n.d.  | n.d.                        | n.d.                                                      | n.d.   | n.d.                                                          | n.d.   |

**Supplementary Figure 6.** Parameter estimation of the temperature dependent reduction of E19\_SS (oxidized: red; reduced: green, by using 0.8 mM protein concentration and 18-fold excess of TCEP **a**) at 15 °C **b**) 25 °C **c**) 37 °C.

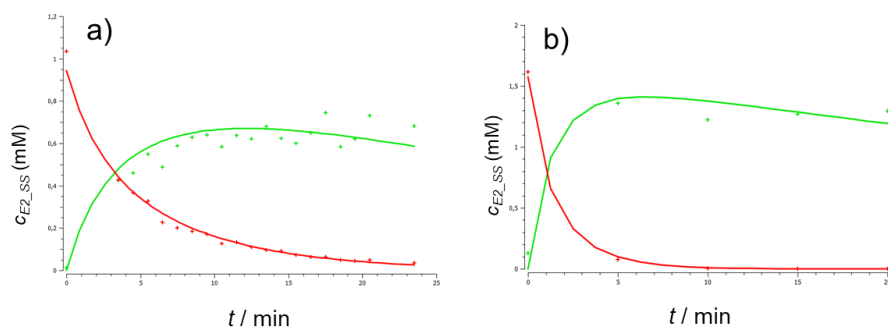

| experimental conditions |        |           |                           |                           |                     |                                  | parameters             |           |                                                           |                 |                             |                                                           |                             |                                                               |                             |
|-------------------------|--------|-----------|---------------------------|---------------------------|---------------------|----------------------------------|------------------------|-----------|-----------------------------------------------------------|-----------------|-----------------------------|-----------------------------------------------------------|-----------------------------|---------------------------------------------------------------|-----------------------------|
| E2_SS                   | T [C°] | [SS] [mM] | [RA <sub>red</sub> ] [mM] | [RA <sub>red</sub> ]/[SS] | Conversion rate [%] | elapsed time to steady state [h] | [O <sub>2</sub> ] [mM] | [SS] [mM] | Reduction $k_1$ [L mmol <sup>-1</sup> min <sup>-1</sup> ] |                 |                             | Oxidation $k_2$ [L mmol <sup>-1</sup> min <sup>-1</sup> ] |                             | Precipitation $k_3$ [L mmol <sup>-1</sup> min <sup>-1</sup> ] |                             |
|                         |        |           |                           |                           |                     |                                  |                        |           | Value                                                     | $t_{1/2}$ [min] | relative std. deviation [%] | Value                                                     | relative std. deviation [%] | Value                                                         | relative std. deviation [%] |
| a)                      | 15     | 1.05      | 1.97                      | 1.88                      | 100                 | ~15 m                            | 0.06                   | 0.94      | $1.37 \times 10^{-1}$                                     | 3               | 16.92                       | $3.95 \times 10^{-1}$                                     | 117.83                      | $2.31 \times 10^{-3}$                                         | 9.47                        |
| b)                      | 15     | 1.74      | 3.26                      | 1.87                      | 100                 | <5 m                             | n.d.                   | 1.57      | $2.59 \times 10^{-1}$                                     | ~1              | 15.37                       | n.d.                                                      | n.d.                        | $1.52 \times 10^{-2}$                                         | 18.07                       |

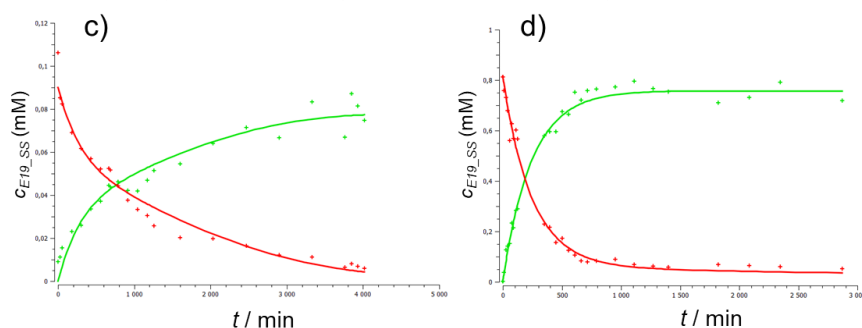

| experimental conditions |        |           |                           |                           |                     |                                  | parameters             |           |                                                           |                 |                             |                                                           |                             |                                                               |                             |
|-------------------------|--------|-----------|---------------------------|---------------------------|---------------------|----------------------------------|------------------------|-----------|-----------------------------------------------------------|-----------------|-----------------------------|-----------------------------------------------------------|-----------------------------|---------------------------------------------------------------|-----------------------------|
| E19_SS                  | T [C°] | [SS] [mM] | [RA <sub>red</sub> ] [mM] | [RA <sub>red</sub> ]/[SS] | Conversion rate [%] | elapsed time to steady state [h] | [O <sub>2</sub> ] [mM] | [SS] [mM] | Reduction $k_1$ [L mmol <sup>-1</sup> min <sup>-1</sup> ] |                 |                             | Oxidation $k_2$ [L mmol <sup>-1</sup> min <sup>-1</sup> ] |                             | Precipitation $k_3$ [L mmol <sup>-1</sup> min <sup>-1</sup> ] |                             |
|                         |        |           |                           |                           |                     |                                  |                        |           | Value                                                     | $t_{1/2}$ [min] | relative std. deviation [%] | Value                                                     | relative std. deviation [%] | Value                                                         | relative std. deviation [%] |
| c)                      | 15     | 0.12      | 1.88                      | 16.29                     | 92                  | ~40                              | 0.07                   | 0.09      | $8.03 \times 10^{-4}$                                     | 466             | 12.37                       | $1.72 \times 10^{-2}$                                     | 14.77                       | $3.60 \times 10^{-5}$                                         | 36.17                       |
| d)                      | 15     | 0.81      | 12.78                     | 15.72                     | 92                  | ~15                              | 1.00                   | 0.82      | $3.05 \times 10^{-4}$                                     | 181             | 3.27                        | $2.69 \times 10^{-4}$                                     | 107.40                      | $1.30 \times 10^{-5}$                                         | 88.29                       |

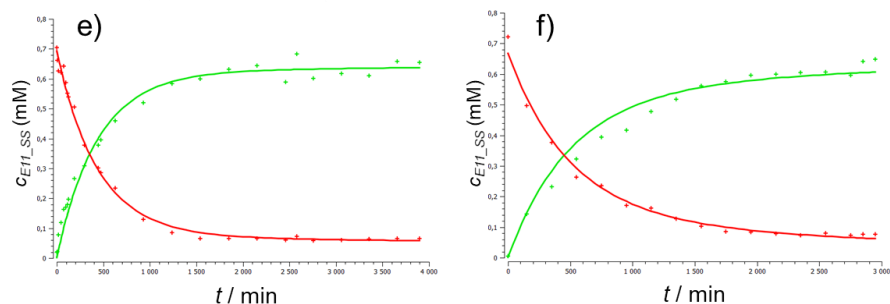

| experimental conditions |        |           |                           |                           |                     |                                  | parameters             |           |                                                           |                 |                             |                                                           |                             |                                                               |                             |
|-------------------------|--------|-----------|---------------------------|---------------------------|---------------------|----------------------------------|------------------------|-----------|-----------------------------------------------------------|-----------------|-----------------------------|-----------------------------------------------------------|-----------------------------|---------------------------------------------------------------|-----------------------------|
| E11_SS                  | T [C°] | [SS] [mM] | [RA <sub>red</sub> ] [mM] | [RA <sub>red</sub> ]/[SS] | Conversion rate [%] | elapsed time to steady state [h] | [O <sub>2</sub> ] [mM] | [SS] [mM] | Reduction $k_1$ [L mmol <sup>-1</sup> min <sup>-1</sup> ] |                 |                             | Oxidation $k_2$ [L mmol <sup>-1</sup> min <sup>-1</sup> ] |                             | Precipitation $k_3$ [L mmol <sup>-1</sup> min <sup>-1</sup> ] |                             |
|                         |        |           |                           |                           |                     |                                  |                        |           | Value                                                     | $t_{1/2}$ [min] | relative std. deviation [%] | Value                                                     | relative std. deviation [%] | Value                                                         | relative std. deviation [%] |
| e)                      | 15     | 0.73      | 12.78                     | 17.61                     | 91                  | ~28                              | 2.00                   | 0.69      | $1.64 \times 10^{-4}$                                     | 337             | 2.98                        | $1.07 \times 10^{-4}$                                     | 154.66                      | n.d.                                                          | n.d.                        |
| f)                      | 15     | 0.73      | 6.47                      | 8.90                      | 89                  | ~35                              | 0.50                   | 0.67      | $2.61 \times 10^{-4}$                                     | 423             | 4.80                        | $4.57 \times 10^{-4}$                                     | 72.94                       | n.d.                                                          | n.d.                        |

**Supplementary Figure 7.** SS-bond reduction as a bimolecular nucleophilic substitution ( $S_N2$ ) reaction both the concentration of the initial oxidized protein (oxidized: red; reduced: green). and the reagent influences the reduction rate. To quantify this extent the initial peptide concentrations were altered for the shortest E2\_SS (a,b) and the longest E19\_SS(c,d) reductions. The experiments were carried out at 15 °C, for E2\_SS reductions ~2-fold excess of TCEP were used while in case of E19\_SS ~16-fold excess of TCEP. In case of E11\_SS (e,f) the excess of TCEP was altered, while concentration of E11\_SS was set to 0.73 mM and the temperature to 15 °C.



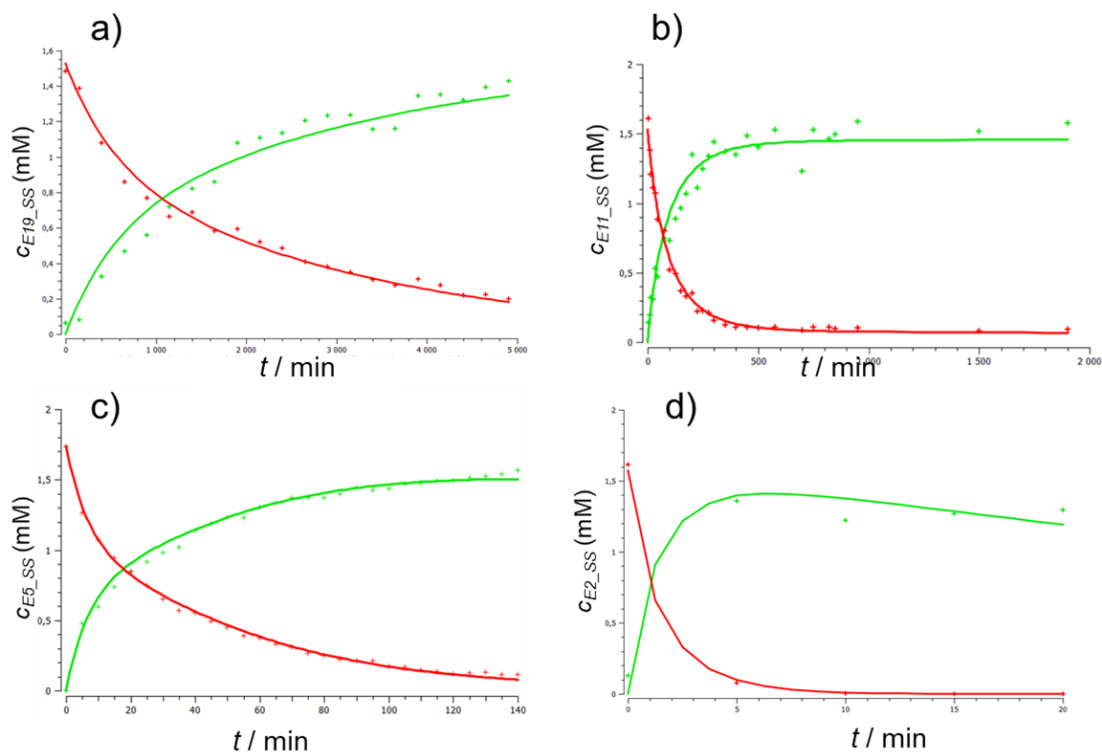

|           | experimental conditions |              |                              |                               |                           |                                              |                           |              | parameters                                                   |                    |                                   |                                                              |                                   |                                                                  |                                   |  |
|-----------|-------------------------|--------------|------------------------------|-------------------------------|---------------------------|----------------------------------------------|---------------------------|--------------|--------------------------------------------------------------|--------------------|-----------------------------------|--------------------------------------------------------------|-----------------------------------|------------------------------------------------------------------|-----------------------------------|--|
|           | T<br>[C°]               | [SS]<br>[mM] | [RA <sub>red</sub> ]<br>[mM] | [RA <sub>red</sub> ]/<br>[SS] | Conversion<br>rate<br>[%] | elapsed<br>time to<br>steady<br>state<br>[h] | [O <sub>2</sub> ]<br>[mM] | [SS]<br>[mM] | Reduction $k_1$<br>[L mmol <sup>-1</sup> min <sup>-1</sup> ] |                    |                                   | Oxidation $k_2$<br>[L mmol <sup>-1</sup> min <sup>-1</sup> ] |                                   | Precipitation $k_3$<br>[L mmol <sup>-1</sup> min <sup>-1</sup> ] |                                   |  |
|           |                         |              |                              |                               |                           |                                              |                           |              | Value                                                        | $t_{1/2}$<br>[min] | relative std.<br>deviation<br>[%] | Value                                                        | relative std.<br>deviation<br>[%] | Value                                                            | relative std.<br>deviation<br>[%] |  |
| a) E19_SS | 15                      | 1.55         | 3.26                         | 2.10                          | 87                        | ~76 h                                        | 0.33                      | 1.53         | $2.71 \times 10^{-4}$                                        | 909                | 7.30                              | $7.24 \times 10^{-4}$                                        | 26.96                             | n.d.                                                             | n.d.                              |  |
| b) E11_SS | 15                      | 1.72         | 3.26                         | 1.89                          | 94                        | ~5–6 h                                       | 1.80                      | 1.56         | $3.68 \times 10^{-3}$                                        | 67                 | 2.61                              | $1.00 \times 10^{-6}$                                        | 14.66                             | $1.00 \times 10^{-6}$                                            | 249.10                            |  |
| c) E5_SS  | 15                      | 1.74         | 3.26                         | 1.88                          | 93                        | ~1 h                                         | 0.58                      | 1.70         | $1.85 \times 10^{-2}$                                        | 14                 | 3.35                              | $4.53 \times 10^{-2}$                                        | 5.71                              | $5.57 \times 10^{-4}$                                            | 16.47                             |  |
| d) E2_SS  | 15                      | 1.74         | 3.26                         | 1.87                          | 100                       | <5 m                                         | n.d.                      | 1.57         | $2.59 \times 10^{-1}$                                        | ~1                 | 15.37                             | n.d.                                                         | n.d.                              | $1.52 \times 10^{-2}$                                            | 18.07                             |  |

**Supplementary Figure 8.** Estimated kinetic parameters of the different length E19\_SS variants: **a)** E19\_SS, **b)** E11\_SS **c)** E5\_SS **d)** E2\_SS (oxidized: red; reduced: green). For each reduction, 1.7 mM protein concentration was used with 2-fold excess of TCEP at 15 °C. Back-oxidation was ignored for E2\_SS, due to the fast reduction rate and the short-term of observation period.

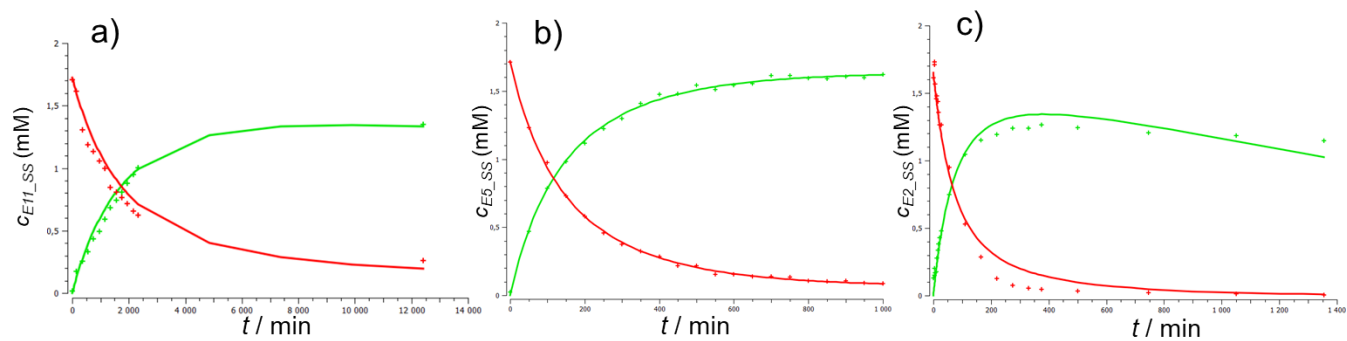

|           | experimental conditions |              |                              |                               |                           |                                              |                           | parameters   |                                                              |                    |                                |                                                              |                                |                                                                  |                                |
|-----------|-------------------------|--------------|------------------------------|-------------------------------|---------------------------|----------------------------------------------|---------------------------|--------------|--------------------------------------------------------------|--------------------|--------------------------------|--------------------------------------------------------------|--------------------------------|------------------------------------------------------------------|--------------------------------|
|           | T<br>[C°]               | [SS]<br>[mM] | [RA <sub>red</sub> ]<br>[mM] | [RA <sub>red</sub> ]/<br>[SS] | Conversion<br>rate<br>[%] | elapsed<br>time to<br>steady<br>state<br>[h] | [O <sub>2</sub> ]<br>[mM] | [SS]<br>[mM] | Reduction $k_1$<br>[L mmol <sup>-1</sup> min <sup>-1</sup> ] |                    |                                | Oxidation $k_2$<br>[L mmol <sup>-1</sup> min <sup>-1</sup> ] |                                | Precipitation $k_3$<br>[L mmol <sup>-1</sup> min <sup>-1</sup> ] |                                |
|           |                         |              |                              |                               |                           |                                              |                           |              | Value                                                        | $t_{1/2}$<br>[min] | relative std.<br>deviation [%] | Value                                                        | relative std.<br>deviation [%] | Value                                                            | relative std.<br>deviation [%] |
| a) E11_SS | 15                      | 1.72         | 3.26                         | 1.89                          | ~84                       | 138 h                                        | 0.024                     | n.d.         | $1.52 \times 10^{-4}$                                        | 1659               | 45.152                         | $5.06 \times 10^{-4}$                                        | 7154.71                        | $3.86 \times 10^{-5}$                                            | 20.686                         |
| b) E5_SS  | 15                      | 1.74         | 3.26                         | 1.88                          | 95                        | 9–10 h                                       | 2.000                     | 1.72         | $2.18 \times 10^{-3}$                                        | 115                | 1.064                          | $6.38 \times 10^{-5}$                                        | 437.15                         | $1.14 \times 10^{-5}$                                            | 80.208                         |
| c) E2_SS  | 15                      | 1.74         | 3.26                         | 1.87                          | 100                       | 5h                                           | 0.334                     | 1.65         | $4.04 \times 10^{-3}$                                        | 62                 | 5.315                          | $2.21 \times 10^{-3}$                                        | 98.22                          | $3.87 \times 10^{-4}$                                            | 9.881                          |

**Supplementary Figure 9.** Estimated kinetic parameters of the different length E19\_SS variants: **a)** E11\_SS **b)** E5\_SS **c)** E2\_SS (oxidized: red; reduced: green). For each reduction, 1.7 mM protein concentration was used with 2-fold excess of DTT at 15 °C.

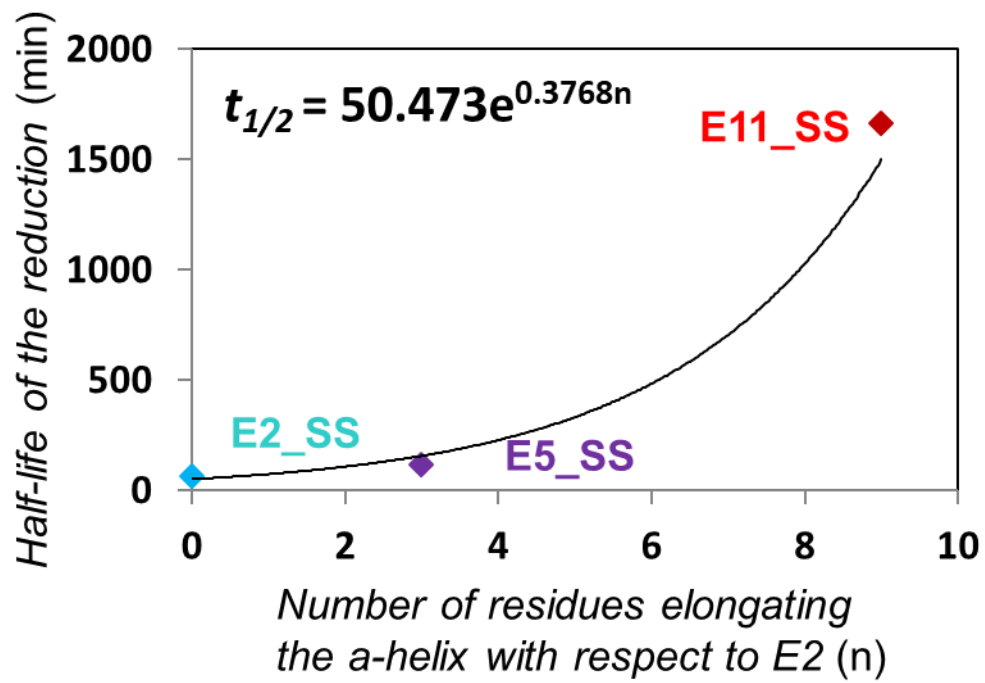

**Supplementary Figure 10.** Dependence of the reduction half-life on the helix length when using 2-fold excess of DTT as reducing agent with 1.7 mM protein at 15 °C.

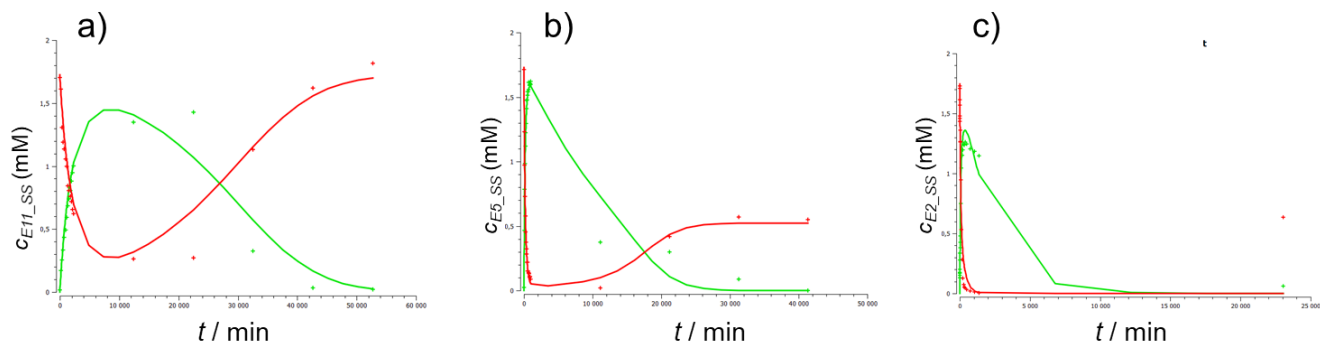

|    |        | [O <sub>2</sub> ]<br>[mM] | [SS]<br>[mM] | Reduction $k_1$<br>[L mmol <sup>-1</sup> min <sup>-1</sup> ] | relative std.<br>deviation<br>[%] | Oxidation $k_2$<br>[L mmol <sup>-1</sup> min <sup>-1</sup> ] | relative std.<br>deviation<br>[%] | Precipitation $k_3$<br>[L mmol <sup>-1</sup> min <sup>-1</sup> ] | relative<br>std.<br>deviation<br>[%] | O <sub>2</sub> diffusion $k_4$<br>[L mmol <sup>-1</sup> min <sup>-1</sup> ] | relative<br>std.<br>deviation<br>[%] |
|----|--------|---------------------------|--------------|--------------------------------------------------------------|-----------------------------------|--------------------------------------------------------------|-----------------------------------|------------------------------------------------------------------|--------------------------------------|-----------------------------------------------------------------------------|--------------------------------------|
| a) | E11_SS | $1.00 \times 10^{-6}$     | 1.65         | $1.54 \times 10^{-4}$                                        | 9.3                               | $1.83 \times 10^{-5}$                                        | 760.3                             | $1.00 \times 10^{-8}$                                            | 21071.7                              | $3.20 \times 10^{-4}$                                                       | 538.1                                |
| b) | E5_SS  | 1.00                      | 1.73         | $2.11 \times 10^{-3}$                                        | 2.5                               | $3.12 \times 10^{-5}$                                        | 5657.6                            | $7.11 \times 10^{-5}$                                            | 6.4                                  | $4.75 \times 10^{-4}$                                                       | 4441.9                               |
| c) | E2_SS* | $4.34 \times 10^{-1}$     | 1.72         | $4.29 \times 10^{-3}$                                        | 7.8                               | $2.97 \times 10^{-3}$                                        | 91.9                              | $4.65 \times 10^{-4}$                                            | 10.6                                 | n.d.                                                                        | n.d.                                 |

**Supplementary Figure 11:** Estimated kinetic parameters of the different length E19\_SS variants: **a)** E11\_SS **b)** E5\_SS **c)** E2\_SS (oxidized: red; reduced: green). For each reduction, 1.7 mM protein concentration was used with 2-fold excess of DTT at 15 °C. \*Due to the inappropriate sampling parameters of E2\_SS the redox-cycle here cannot be unambiguously estimated, nevertheless the last measured point proves that both re-oxidation and oligomerization (precipitation) occur.

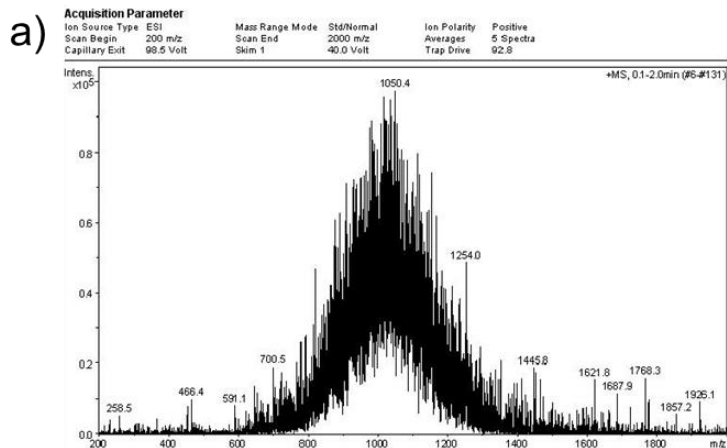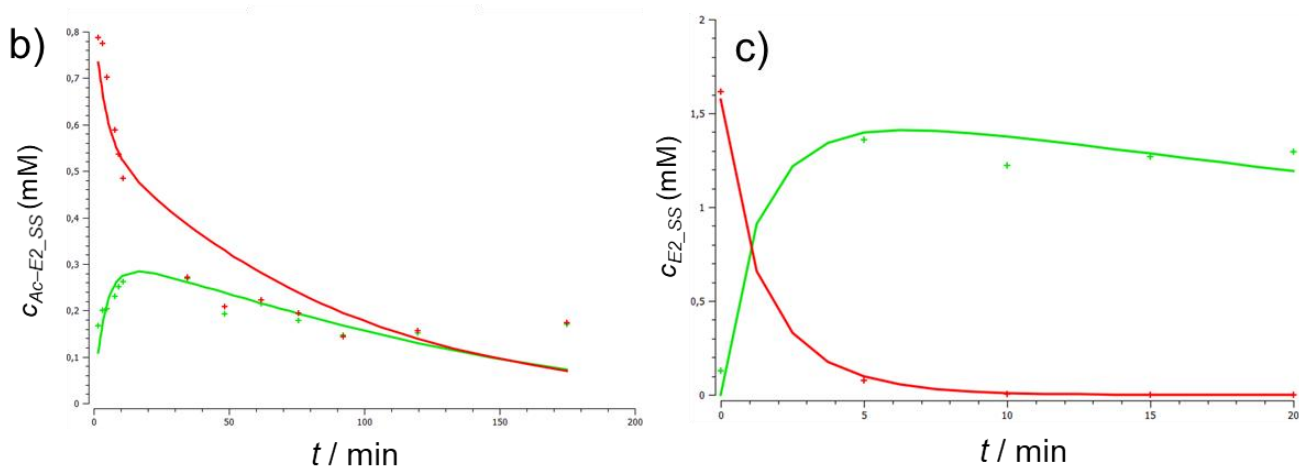

|    |          | [O <sub>2</sub> ]<br>[mM] | [SS]<br>[mM] | Reduction $k_1$<br>[L mmol <sup>-1</sup> min <sup>-1</sup> ] | relative<br>std.<br>deviation<br>[%] | Oxidation $k_2$<br>[L mmol <sup>-1</sup> min <sup>-1</sup> ] | relative<br>std.<br>deviation<br>[%] | Precipitation $k_3$<br>[L mmol <sup>-1</sup> min <sup>-1</sup> ] | relative<br>std.<br>deviation<br>[%] |
|----|----------|---------------------------|--------------|--------------------------------------------------------------|--------------------------------------|--------------------------------------------------------------|--------------------------------------|------------------------------------------------------------------|--------------------------------------|
| b) | Ac-E2_SS | 1.71                      | 0.84         | $2.79 \times 10^{-2}$                                        | 15.9                                 | $7.17 \times 10^{-2}$                                        | 34.7                                 | $2.30 \times 10^{-2}$                                            | 9.9                                  |
| c) | E2_SS    | n.d.                      | 1.575        | $2.59 \times 10^{-1}$                                        | 15.4                                 | n.d.                                                         | n.d.                                 | $1.52 \times 10^{-2}$                                            | 18.1                                 |

**Supplementary Figure 12.** **a)** ESI-MS spectra of the heterogeneous aggregate of Ac-E2\_SS after 2000 minutes reaction time followed by a HPLC purification. **b)** Fit of the kinetic model of Ac-E2\_SS. Crosses show the measured data, while continuous curves show the fitted model. Red color is for the (oxidized) SS species, while green color is for the (reduced) 2SH species. For the reduction, ~ 1.7 mM initial Ac-E2\_SS was used with 2-fold excess of TCEP at 15 °C and  $pH = 7$ . During the time between the first measured point and the addition of the reducing agent (~ 3 minutes) almost half of the dissolved protein precipitated. That is why the parameter estimation begins from 0.84 mM of Ac-E2\_SS. **c)** For the reduction, ~ 1.7 mM initial E2\_SS was used with 2-fold excess of TCEP at 15 °C and  $pH = 7$ . On this short timescale (20 min) the back oxidation was negligible (scale of  $10^{-6}$ ) therefore it wasn't involved in parameter estimation.

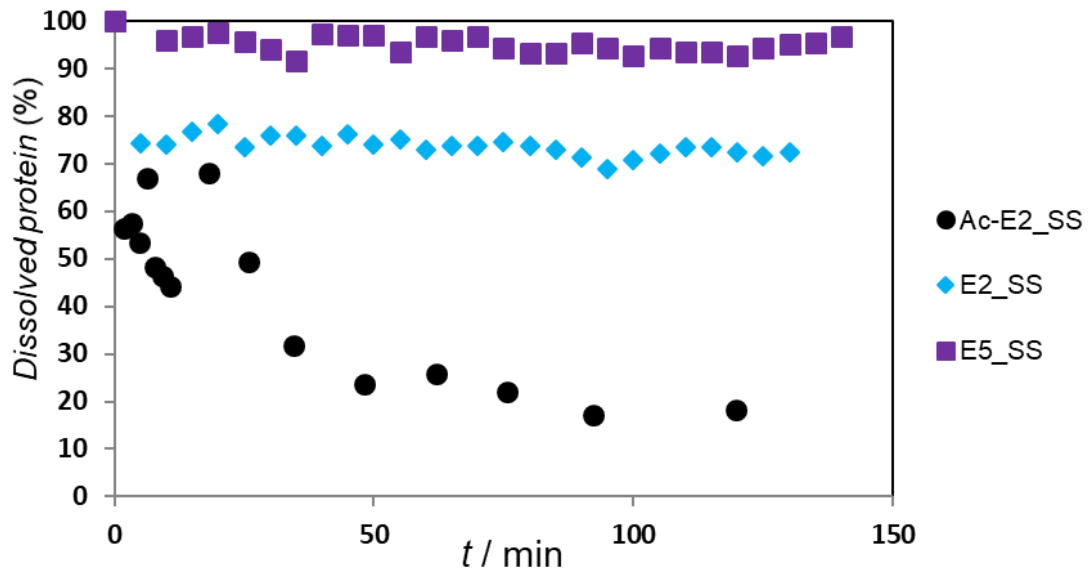

**Supplementary Figure 13.** Dissolved protein ratio (in %) of E5\_SS, E2\_SS and Ac\_E2\_SS compared to their starting values (before adding the TCEP) as a function of time. In each of the cases, ~1.7 mM protein concentration was used with 2-fold excess of TCEP at 15 °C and *pH* = 7. Ac-E2\_SS almost immediately precipitates right at the beginning of the “short” observation period of time.

|       |         | i,i | i,i+1 | i,i+2 | i,i+3 | i,i+4 | i,i+n,n>5 | Sum | RMSD backbone | RMSD all atom |
|-------|---------|-----|-------|-------|-------|-------|-----------|-----|---------------|---------------|
| I.    | E19_SS  | 456 | 219   | 32    | 109   | 48    | 119       | 983 | 0.29          | 0.60          |
| II.   | E19_2SH | 428 | 157   | 23    | 78    | 36    | 91        | 813 | 0.45          | 0.72          |
| III.  | E19     | 284 | 185   | 26    | 114   | 78    | 87        | 774 | 0.33          | 1.15          |
| IV.   | E11_SS  | 376 | 149   | 22    | 85    | 36    | 113       | 781 | 0.36          | 0.67          |
| V.    | E11_2SH | 372 | 146   | 20    | 59    | 39    | 105       | 741 | 0.43          | 0.76          |
| VI.   | E11     | 174 | 61    | 3     | 46    | 21    | 53        | 358 | 1.37          | 2.28          |
| VII.  | E5_SS   | 274 | 136   | 17    | 53    | 28    | 101       | 609 | 0.56          | 1.24          |
| VIII. | E5_2SH  | 264 | 123   | 28    | 59    | 25    | 81        | 580 | 0.62          | 1.35          |
| IX.   | E5      | 176 | 100   | 17    | 29    | 15    | 41        | 378 | 0.58          | 2.21          |
| X.    | E2_SS   | 259 | 143   | 36    | 64    | 30    | 124       | 656 | 0.11          | 0.44          |
| XI.   | E2_2SH  | 241 | 98    | 26    | 32    | 15    | 65        | 477 | 0.50          | 0.91          |
| XII.  | E2      | 136 | 37    | 2     | 4     | 5     | 19        | 203 | 1.24          | 2.16          |

**Supplementary Table 1.** The NOE derived restraint sets applied for the 10 membered structure ensemble calculations (Supplementary Figure 2. I-XII.). Restraints were categorized from intraresidual (i,i) to long range (i,i+n) ones, while structures with their RMSD values.
